# Supplementary material
Source: PubMed Central journal article supplement (PMC3589256)
Supplement: supp_djs530_jnci_JNCI_12_1260_s01.pdf [file supp_djs530_jnci_JNCI_12_1260_s01.pdf]

**Supplemental Table 1. Interaction test by lag time intervals for five and ten-year all cause mortality, NIH-AARP Diet and Health Study (n=1400)\***

|                                         | Body mass index (kg/m <sup>2</sup> ) | Diagnosis 1995-1998 |           | Diagnosis 1999-2002 |           | Diagnosis 2003-2006 |           |
|-----------------------------------------|--------------------------------------|---------------------|-----------|---------------------|-----------|---------------------|-----------|
|                                         |                                      | HR                  | 95% CI    | HR                  | 95% CI    | HR                  | 95% CI    |
| <b>Five-year mortality</b> <sup>†</sup> | 18.5-<25                             | 1.00                |           | 0.69                | 0.26-1.84 | 0.82                | 0.30-2.21 |
|                                         | 25-<30                               | 1.42                | 0.55-3.67 | 1.30                | 0.52-3.25 | 1.33                | 0.54-3.29 |
|                                         | 30-<35                               | 1.79                | 0.66-4.83 | 1.61                | 0.64-4.05 | 1.09                | 0.47-3.07 |
|                                         | 35+                                  | 1.67                | 0.55-5.07 | 1.20                | 0.47-3.07 | 2.90                | 0.54-3.29 |
| <b>Ten-year mortality</b> <sup>†</sup>  | 18.5-<25                             | 1.00                |           | 0.47                | 0.25-0.92 | 0.64                | 0.31-1.33 |
|                                         | 25-<30                               | 0.90                | 0.48-1.68 | 0.99                | 0.55-1.79 | 1.08                | 0.59-1.98 |
|                                         | 30-<35                               | 1.10                | 0.57-2.17 | 1.18                | 0.64-2.17 | 0.91                | 0.47-1.78 |
|                                         | 35+                                  | 1.47                | 0.73-2.95 | 0.98                | 0.53-1.80 | 2.39                | 1.29-4.40 |

\*Abbreviations: NIH- National Institutes of Health, HR- hazard ratio, CI- confidence interval; Interaction test p=0.145 for five-year models and p=0.056 for ten-year models.

<sup>†</sup>Models were adjusted for categorical tumor grade, tumor stage, surgery, chemotherapy, race, family history of breast cancer, diabetes, and smoking status.

**Supplemental Table 2. Associations between pre-diagnosis body mass index (BMI) and five and ten-year all cause mortality, stratified by tumor stage and grade, NIH-AARP Diet and Health Study (n=1400)\***

| BMI (kg/m <sup>2</sup> )        | 18.5-25<br>HR | 25-<30<br>HR | 95% CI    | 30-<35<br>HR | 95% CI    | 35+<br>HR | 95% CI    | P trend | Continuous <sup>†</sup> |
|---------------------------------|---------------|--------------|-----------|--------------|-----------|-----------|-----------|---------|-------------------------|
| <b>Five-Year Mortality</b>      |               |              |           |              |           |           |           |         |                         |
| <b>Cancer Stage</b>             |               |              |           |              |           |           |           |         |                         |
| Localized                       | 1.00          | 2.29         | 1.07-4.90 | 1.75         | 0.75-4.09 | 3.45      | 1.58-7.50 | .006    | 1.24 (1.06-1.46)        |
| Regional /Distant               | 1.00          | 1.29         | 0.59-2.80 | 1.50         | 0.66-3.39 | 2.22      | 0.94-5.24 | .062    | 1.19 (0.99-1.43)        |
| Unknown                         | 1.00          | 2.29         | 1.08-4.84 | 3.13         | 1.47-6.69 | 2.85      | 1.19-6.84 | .008    | 1.24 (1.04-1.48)        |
| <b>Cancer Grade</b>             |               |              |           |              |           |           |           |         |                         |
| Well differentiated             | 1.00          | 1.60         | 0.70-3.65 | 1.12         | 0.45-2.80 | 2.47      | 1.07-5.72 | .081    | 1.17 (0.97-1.42)        |
| Moderately differentiated       | 1.00          | 1.82         | 0.69-4.80 | 3.31         | 1.31-8.37 | 2.89      | 1.15-7.25 | .011    | 1.19 (1.01-1.42)        |
| Poorly differentiated           | 1.00          | 1.60         | 0.77-3.31 | 1.80         | 0.82-3.93 | 2.30      | 0.91-5.82 | .078    | 1.35 (1.09-1.68)        |
| <b>Ten-Year Mortality</b>       |               |              |           |              |           |           |           |         |                         |
| <b>Cancer Stage</b>             |               |              |           |              |           |           |           |         |                         |
| Localized                       | 1.00          | 1.77         | 1.03-3.05 | 1.53         | 0.84-2.78 | 2.36      | 1.34-4.15 | .008    | 1.22 (1.08-1.40)        |
| Regional /Distant               | 1.00          | 1.66         | 0.80-3.43 | 1.58         | 0.72-3.45 | 2.89      | 1.34-6.26 | .013    | 1.20 (1.01-1.41)        |
| Unknown                         | 1.00          | 1.63         | 0.88-3.04 | 2.72         | 1.46-5.08 | 3.01      | 1.51-6.01 | <.001   | 1.27 (1.10-1.46)        |
| <b>Cancer Grade<sup>‡</sup></b> |               |              |           |              |           |           |           |         |                         |
| Well differentiated             | 1.00          | 1.09         | 0.54-2.16 | 1.12         | 0.54-2.32 | 3.10      | 1.63-5.88 | <.001   | 1.31 (1.13-1.51)        |
| Moderately differentiated       | 1.00          | 1.50         | 0.77-2.91 | 2.18         | 1.11-4.28 | 2.14      | 1.11-4.09 | .012    | 1.16 (1.01-1.33)        |
| Poorly differentiated           | 1.00          | 1.59         | 0.83-3.05 | 1.96         | 0.97-3.96 | 1.75      | 0.73-4.19 | .115    | 1.28 (1.05-1.56)        |

\*Abbreviations: NIH-National Institutes of Health, HR- hazard ratio, CI- confidence interval; Models were adjusted for categorical variables of surgery, chemotherapy, race, family history of breast cancer, diabetes, and smoking status, and for tumor grade and stage where appropriate.

<sup>†</sup>Continuous models were scaled for a 5-unit change in BMI.

<sup>‡</sup>There were too few deaths with unknown grade to generate HRs for these women (24 deaths at five years, 32 at ten years).

**Supplemental Table 3. Associations between pre-diagnosis body mass index (BMI) and five and ten-year all cause mortality among women with endometrial cancer, without adjusting for stage, NIH-AARP Diet and Health study (n=1400)\***

| BMI (kg/m <sup>2</sup> )   | 18.5-25 |      | 25-<30 |      |                        | 30-<35 |      |            | 35+ |      |            | P trend | Continuous <sup>†</sup> |
|----------------------------|---------|------|--------|------|------------------------|--------|------|------------|-----|------|------------|---------|-------------------------|
|                            | N       | HR   | N      | HR   | 95% CI                 | N      | HR   | 95% CI     | N   | HR   | 95% CI     |         |                         |
| <b>Five-year mortality</b> |         |      |        |      |                        |        |      |            |     |      |            |         |                         |
| All cause                  | 32      | 1.00 | 73     | 1.90 | 1.24-2.91              | 56     | 1.97 | 1.25-3.09  | 55  | 2.59 | 1.64-4.09  | <.001   | 1.20 (1.09-1.32)        |
| Endometrial                | 16      | 1.00 | 40     | 1.92 | 1.06-3.50 <sup>‡</sup> | 36     | 2.62 | 1.41-4.86  | 28  | 2.86 | 1.48-5.53  | <.001   | 1.22 (1.07-1.39)        |
| Cardiovascular             | 4       | 1.00 | 9      | 2.07 | 0.62-6.91              | 4      | 1.03 | 0.24-4.38  | 8   | 2.89 | 0.83-10.12 | .205    | 1.29 (0.99-1.67)        |
| <b>Ten-year mortality</b>  |         |      |        |      |                        |        |      |            |     |      |            |         |                         |
| All cause                  | 51      | 1.00 | 94     | 1.58 | 1.12-2.24              | 75     | 1.69 | 1.17-2.444 | 79  | 2.31 | 1.60-3.34  | <.001   | 1.19 (1.10-1.29)        |
| Endometrial                | 23      | 1.00 | 41     | 1.39 | 0.82-2.36              | 39     | 1.90 | 1.10-3.27  | 30  | 2.04 | 1.14-3.66  | .007    | 1.18 (1.05-1.33)        |
| Cardiovascular             | 6       | 1.00 | 13     | 1.85 | 0.69-4.94              | 10     | 1.85 | 0.65-5.25  | 18  | 4.20 | 1.60-11.03 | .003    | 1.36 (1.13-1.65)        |

\* Abbreviations: NIH-National Institutes of Health, HR- hazard ratio, CI- confidence interval; Models are adjusted for categorical variables tumor grade, surgery, chemotherapy, race, family history of breast cancer, diabetes, and smoking status.

<sup>†</sup> Continuous models were scaled by a 5-unit change in BMI.

<sup>‡</sup>Confidence interval changed significance from Table 2. Table 2 CI p-value=0.12, Supplemental Table 3 CI p-value=0.03.

**Supplemental Table 4. Associations between pre-diagnosis body mass index (BMI) and five and ten-year all cause mortality among women with endometrial cancer, stratified by smoking status, NIH-AARP Diet and Health study (n=1400)\***

| BMI (kg/m <sup>2</sup> )   | Never Smokers |                          | Former Smokers |                          | Current smokers |                          |
|----------------------------|---------------|--------------------------|----------------|--------------------------|-----------------|--------------------------|
|                            | Deaths/total  | HR (95% CI) <sup>†</sup> | Deaths/total   | HR (95% CI) <sup>†</sup> | Deaths/total    | HR (95% CI) <sup>†</sup> |
| <b>Five-year mortality</b> |               |                          |                |                          |                 |                          |
| 18.5-<25                   | 9/181         | Ref.                     | 15/159         | Ref.                     | 7/35            | Ref.                     |
| 25-<30                     | 33/197        | 2.61 (1.22-5.60)         | 31/149         | 1.61 (0.85-3.07)         | 8/149           | 0.85 (0.24-3.05)         |
| 30-<35                     | 26/171        | 2.66 (1.23-5.77)         | 21/102         | 1.45 (0.71-2.96)         | 6/20            | 1.72 (0.36-8.19)         |
| 35+                        | 28/160        | 4.39 (2.00-9.62)         | 23/131         | 1.83 (0.90-3.74)         | 3/15            | 2.18 (0.43-11.01)        |
| P trend                    |               | <.001                    |                | .158                     |                 | .264                     |
| Continuous <sup>‡</sup>    |               | 1.34 (1.16-1.56)         |                | 1.06 (0.91-1.24)         |                 | 1.39 (0.87-2.21)         |
| <b>Ten-year mortality</b>  |               |                          |                |                          |                 |                          |
| 18.5-<25                   | 17/181        | Ref.                     | 23/159         | Ref.                     | 10/35           | Ref.                     |
| 25-<30                     | 44/197        | 2.29 (1.29-4.08)         | 40/149         | 1.51 (0.85-2.58)         | 9/149           | 0.54 (0.19-1.57)         |
| 30-<35                     | 39/171        | 2.46 (1.37-4.41)         | 22/102         | 1.12 (0.60-2.09)         | 10/20           | 1.19 (0.36-3.91)         |
| 35+                        | 38/160        | 3.35 (1.83-6.13)         | 34/131         | 1.82 (1.03-3.24)         | 5/15            | 2.18 (0.63-7.62)         |
| P trend                    |               | <.001                    |                | .106                     |                 | .213                     |
| Continuous <sup>‡</sup>    |               | 1.26 (1.12-1.42)         |                | 1.12 (0.98-1.27)         |                 | 1.37 (0.96-1.94)         |

\*Abbreviations: NIH-National Institutes of Health, HR- hazard ratio, CI- confidence interval.

<sup>†</sup>Multivariate models were adjusted for categorical variables of tumor grade, tumor stage, surgery, chemotherapy, race, family history of breast cancer, diabetes, and smoking dose where appropriate.

<sup>‡</sup> Continuous models were scaled by a 5-unit change in BMI.
