# Supplementary material
Source: PubMed Central journal article supplement (PMC3589256)
Supplement: supp_djs530_jnci_JNCI_12_1260_s02.pdf [file supp_djs530_jnci_JNCI_12_1260_s02.pdf]

## Supplementary methods

### Case ascertainment

Type I cases included endometrioid, mucinous, tubular, adenocarcinoma not otherwise specified (nos), and adenocarcinoma with squamous differentiation (ICD codes 8380, 8382, 8383, 8480, 8481, 8482, 8210, 8140, 8560, 8570). Type II cases were those classified as serous, clear cell, mixed cell, small cell and squamous cell (histologic codes 8440, 8441, 8460, 8461, 8310, 8323, 8041, 8070, 8071, 8076). With only 108 Type II tumors and 36 deaths we had insufficient power to report on the association between BMI and mortality among these women. The remaining 41 women could not be classified as Type I or II (histologic codes 8000, 8010, 8012, 8020, 8021, 8022, 8050, 8255, 8260, 8320).

### Statistical Analysis

The estimates in the statistical interaction test in Supplemental Table 1 come from a single model for five year mortality and a single model for ten year mortality that included the main effects for BMI and interaction terms of BMI with year of diagnosis. In five-year BMI models the p-interaction=0.145 and in ten-year BMI models the p-interaction=0.056. Given the clinical significance of five and ten-year mortality and the greater heterogeneity in ten-year models we elected to present results for each separately.
